# Supplementary material
Source: PubMed Central journal article supplement (PMC5880742)
Supplement: NIHMS930660-supplement-supplement_1.pdf [file NIHMS930660-supplement-supplement_1.pdf]

Supplemental Table 1 A: Infectious ICD 9 codes

|      |                                                                                                                                                 |
|------|-------------------------------------------------------------------------------------------------------------------------------------------------|
| 1144 | TUBERCULOUS FIBROSIS OF LUNG, TUBERCLE BACILLI NOT FOUND (IN SPUTUM) BY MICROSCOPY, BUT FOUND BY BACTERIAL CULTURE                              |
| 1145 | TUBERCULOUS FIBROSIS OF LUNG, TUBERCLE BACILLI NOT FOUND BY BACTERIOLOGICAL EXAMINATION, BUT TUBERCULOSIS CONFIRMED HISTOLOGICALLY              |
| 1200 | TUBERCULOSIS PLEURISY, UNSPECIFIED                                                                                                              |
| 1202 | TUBERCULOSIS PLEURISY, BACTERIOLOGICAL OR HISTOLOGICAL EXAMINATION UNKNOWN (AT PRESENT)                                                         |
| 1206 | TUBERCULOSIS PLEURISY, TUBERCLE BACILLI NOT FOUND BY BACTERIOLOGICAL OR HISTORICAL EXAMINATION BUT TUBERCULOSIS CONFIRMED BY OTHER METHODS]     |
| 1215 | TUBERCULOSIS OF INTRATHORACIC LYMPH NODES, TUBERCLE BACILLI NOT FOUND BY BACTERIOLOGICAL EXAMINATION, BUT TUBERCULOSIS CONFIRMED HISTOLOGICALLY |
| 1401 | TUBERCULOUS PERITONITIS, BACTERIOLOGICAL OR HISTOLOGICAL EXAMINATION NOT DONE                                                                   |
| 1404 | TUBERCULOUS PERITONITIS, TUBERCLE BACILLI NOT FOUND (IN SPUTUM) BY MICROSCOPY, BUT FOUND BY BACTERIAL CULTURE                                   |
| 1500 | TUBERCULOSIS OF BONES AND JOINTS: VERTEBRAL COLUMN, UNSPECIFIED                                                                                 |
| 1504 | TUBERCULOSIS OF BONES AND JOINTS: VERTEBRAL COLUMN, TUBERCLE BACILLI NOT FOUND (IN SPUTUM) BY MICROSCOPY, BUT FOUND BY BACTERIAL CULTURE        |
| 1523 | TUBERCULOSIS OF BONES AND JOINTS: KNEE, TUBERCLE BACILLI FOUND (IN SPUTUM) BY MICROSCOPY                                                        |
| 1720 | TUBERCULOSIS OF OTHER ORGANS: PERIPHERAL LYMPH NODES, UNSPECIFIED                                                                               |
| 1722 | TUBERCULOSIS OF OTHER ORGANS: PERIPHERAL LYMPH NODES, BACTERIOLOGICAL OR HISTOLOGICAL EXAMINATION UNKNOWN (AT PRESENT)                          |
| 1724 | TUBERCULOSIS OF OTHER ORGANS: PERIPHERAL LYMPH NODES, TUBERCLE BACILLI NOT FOUND (IN SPUTUM) BY MICROSCOPY, BUT FOUND BY BACTERIAL CULTURE      |
| 1790 | TUBERCULOSIS OF OTHER ORGANS: OTHER SPECIFIED ORGANS, UNSPECIFIED                                                                               |
| 1794 | TUBERCULOSIS OF OTHER ORGANS: OTHER SPECIFIED ORGANS, TUBERCLE BACILLI NOT FOUND (IN SPUTUM) BY MICROSCOPY, BUT FOUND BY BACTERIAL CULTURE      |
| 1883 | OTHER SPECIFIED MILIARY TUBERCULOSIS, TUBERCLE BACILLI FOUND (IN SPUTUM) BY MICROSCOPY                                                          |
| 1890 | MILIARY TUBERCULOSIS, UNSPECIFIED, UNSPECIFIED                                                                                                  |
| 1894 | MILIARY TUBERCULOSIS, UNSPECIFIED, TUBERCLE BACILLI NOT FOUND (IN SPUTUM) BY MICROSCOPY, BUT FOUND BY BACTERIAL CULTURE                         |
| 312  | DIS DUE TO OTHER MYCOBACTERIA: DISSEMINATED                                                                                                     |
| 340  | STREP SORE THROAT OCT05-                                                                                                                        |
| 35   | ERYSIPELAS OCT05-                                                                                                                               |
| 402  | WHIPPLE'S DISEASE OCT05-                                                                                                                        |

|       |                                                             |
|-------|-------------------------------------------------------------|
| 913   | SECONDARY SYPHILLIS OF SKIN OR MUCOUS MEMBRANES             |
| 949   | NEUROSYPHILLIS, UNSPECIFIED                                 |
| 980   | ACUTE GC INFECT LOWER GU OCT05-                             |
| 9953  | LOWER GENITOURINARY SITES (CHLAMYDIA TRACHOMATIS)           |
| 9954  | OTHER GENITOURINARY SITES (CHLAMYDIA TRACHOMATIS)           |
| 3229  | MENINGITIS NOS OCT05-                                       |
| 36000 | PURULENT ENDOPHTHALM NOS OCT05-                             |
| 36001 | ACUTE ENDOPHTHALMITIS OCT05-                                |
| 37200 | ACUTE CONJUNCTIVITIS NOS OCT05-                             |
| 37220 | BLEPHAROCONJUNCTIVIT NOS OCT05-                             |
| 37230 | CONJUNCTIVITIS NOS OCT05-                                   |
| 37313 | ABSCESS OF EYELID OCT05-                                    |
| 37532 | ACUTE DACRYOCYSTITIS OCT05-                                 |
| 38003 | CHONDRITIS OF PINNA                                         |
| 38010 | INFECTION OTITIS EXTERNA NOS OCT05-                         |
| 38014 | MALIGNANT OTITIS EXTERNA OCT05-                             |
| 38200 | AC SUPP OTITIS MEDIA NOS OCT05-                             |
| 38201 | AC SUPP OM W DRUM RUPT OCT05-                               |
| 3824  | SUPPUR OTITIS MEDIA NOS OCT05-                              |
| 3829  | OTITIS MEDIA NOS OCT05-                                     |
| 38300 | AC MASTOIDITIS W/O COMPL OCT05-                             |
| 38302 | AC MASTOIDITIS-COMPL NEC OCT05-                             |
| 4610  | AC MAXILLARY SINUSITIS OCT05-                               |
| 4611  | AC FRONTAL SINUSITIS OCT05-                                 |
| 4612  | AC ETHMOIDAL SINUSITIS OCT05-                               |
| 4613  | AC SPHENOIDAL SINUSITIS OCT05-                              |
| 4618  | OTHER ACUTE SINUSITIS OCT05-                                |
| 4619  | ACUTE SINUSITIS NOS OCT05-                                  |
| 462   | ACUTE PHARYNGITIS OCT05-                                    |
| 463   | ACUTE TONSILLITIS OCT05-                                    |
| 46400 | ACUTE LARYNGITIS W/O MENTION OF OBSTRUCTION                 |
| 46410 | ACUTE TRACHEITIS W/O MENTION OF OBSTRUCTION                 |
| 46411 | ACUTE TRACHEITIS WITH OBSTRUCTION                           |
| 46430 | AC EPIGLOTTITIS NO OBSTR OCT05-                             |
| 46431 | AC EPIGLOTTITIS W OBSTR OCT05-                              |
| 46450 | SUPRAGLOTTITIS, UNSPECIFIED, WITHOUT MENTION OF OBSTRUCTION |
| 46451 | SUPRAGLOTTITIS, UNSPECIFIED, WITH OBSTRUCTION               |
| 475   | PERITONSILLAR ABSCESS OCT05-                                |
| 47822 | PARAPHARYNGEAL ABSCESS OCT05-                               |
| 47824 | RETROPHARYNGEAL ABSCESS OCT05-                              |
| 51901 | TRACHEOSTOMY INFECTION OCT05-                               |
| 5225  | PERIAPICAL ABSCESS OCT05-                                   |
| 52331 | AGGRES PERIODONTITIS,LOC OCT06-                             |
| 52333 | ACUTE PERIODONTITIS OCT06-                                  |
| 5273  | SALIVARY GLAND ABSCESS OCT05-                               |
| 5283  | CELLULITIS/ABSCESS MOUTH OCT05-                             |
| 56731 | PSOAS MUSCLE ABSCESS OCT05-                                 |
| 56738 | RETROPERITON ABSCESS NEC OCT05-                             |

|       |                                                                 |
|-------|-----------------------------------------------------------------|
| 56739 | RETROPERITON INFECT NEC OCT05-                                  |
| 56782 | SCLEROSING MEENTERITIS OCT05-                                   |
| 57400 | CHOLELITH W AC CHOLECYST                                        |
| 57401 | CHOLELITH/AC GB INF-OBST                                        |
| 57430 | CHOLEDOCHOLITH/AC GB INF                                        |
| 57431 | CHOLEDOCHLITH/AC GB-OBST                                        |
| 57460 | GALL&BIL CAL W/AC W/O OB                                        |
| 57461 | GALL&BIL CAL W/AC W OBS                                         |
| 57480 | GAL&BIL CAL W/AC&CHR W/O                                        |
| 57481 | GAL&BIL CAL W/AC&CH W OB                                        |
| 57512 | AC&CHRON CHOLECYSTITIS OCT05-                                   |
| 5754  | PERFORATION GALLBLADDER                                         |
| 5761  | CHOLANGITIS                                                     |
| 5770  | ACUTE PANCREATITIS OCT05-                                       |
| 59581 | CYSTITIS CYSTICA OCT05-                                         |
| 6144  | CHRON OR UNSP CELLULITIS OCT05-                                 |
| 6149  | PID NOS OCT05-                                                  |
| 6160  | CERVICITIS OCT05-                                               |
| 61610 | VAGINITIS NOS OCT05-                                            |
| 6390  | POSTABORTION GU INFECT OCT05-                                   |
| 64783 | INFECT DIS NEC-ANTEPART OCT05-                                  |
| 64784 | INFECT DIS NEC-POSTPART OCT05-                                  |
| 64793 | INFECT NOS-ANTEPARTUM OCT05-                                    |
| 683   | ACUTE LYMPHADENITIS OCT05-                                      |
| 68609 | PYODERMA OTHER OCT05-                                           |
| 69581 | RITTER'S DISEASE OCT05-                                         |
| 7280  | INFECTIVE MYOSITIS OCT05-                                       |
| 7854  | GANGRENE OCT05-                                                 |
| 9583  | POSTTRAUMATIC WOUND INFECTION NOT ELSEWHERE CLASSIFIED          |
| 99590 | SIRS, NOS OCT05-                                                |
| 99762 | INFECTION AMPUTAT STUMP OCT05-                                  |
| 31    | SALMONELLA SEPTICEMIA                                           |
| 362   | MENINGOCOCCEMIA                                                 |
| 380   | STREPTOCOCCAL SEPTICEMIA                                        |
| 3810  | STAPHYLCOCC SEPTICEMIA NOS                                      |
| 3811  | METHICILLIN SUSCEPTIBLE STAPHYLOCOCCUS AUREUS SEPTICEMIA OCT08- |
| 3812  | METHICILLIN RESISTANT STAPHYLOCOCCUS AUREUS SEPTICEMIA OCT08-   |
| 3819  | STAPHYLCOCC SEPTICEM NEC                                        |
| 382   | PNEUMOCOCCAL SEPTICEMIA                                         |
| 383   | ANAEROBIC SEPTICEMIA                                            |
| 3840  | GRAM-NEG SEPTICEMIA NOS                                         |
| 3841  | H. INFLUENAE SEPTICEMIA                                         |
| 3842  | E COLI SEPTICEMIA                                               |
| 3843  | PSEUDOMONAS SEPTICEMIA                                          |
| 3844  | SERRATIA SEPTICEMIA                                             |
| 3849  | GRAM-NEG SEPTICEMIA NEC                                         |

|       |                                          |
|-------|------------------------------------------|
| 388   | SEPTICEMIA NEC                           |
| 389   | SEPTICEMIA NOS                           |
| 4082  | TOXIC SHOCK SYNDROME                     |
| 78552 | SEPTIC SHOCK                             |
| 7907  | BACTEREMIA                               |
| 99591 | SIRS-INFECT W/O ORG DYSF (SEPSIS)        |
| 99592 | SIRS-INFECT W ORGAN DYSF (SEVERE SEPSIS) |
| 71100 | PYOGEN ARTHRITIS-UNSPEC                  |
| 71101 | PYOGEN ARTHRITIS-SHLDER                  |
| 71102 | PYOGEN ARTHRITIS-UP/ARM                  |
| 71103 | PYOGEN ARTHRITIS-FOREARM                 |
| 71104 | PYOGEN ARTHRITIS-HAND                    |
| 71105 | PYOGEN ARTHRITIS-PELVIS                  |
| 71106 | PYOGEN ARTHRITIS-L/LEG                   |
| 71107 | PYOGEN ARTHRITIS-ANKLE                   |
| 71108 | PYOGEN ARTHRITIS NEC                     |
| 71109 | PYOGEN ARTHRITIS-MULT                    |
| 71191 | INF ARTHRITIS NOS-SHLDER                 |
| 71192 | INF ARTHRITIS NOS-UP/ARM                 |
| 71193 | INF ARTHRIT NOS-FOREARM                  |
| 71195 | INF ARTHRIT NOS-PELVIS                   |
| 71197 | INF ARTHRIT NOS-ANKLE                    |
| 73001 | AC OSTEOMYELITIS-SHLDER                  |
| 73002 | AC OSTEOMYELITIS-UP/ARM                  |
| 73004 | AC OSTEOMYELITIS-HAND                    |
| 73005 | AC OSTEOMYELITIS-PELVIS                  |
| 73006 | AC OSTEOMYELITIS-L/LEG                   |
| 73007 | AC OSTEOMYELITIS-ANKLE                   |
| 73008 | AC OSTEOMYELITIS NEC                     |
| 73020 | OSTEOMYELITIS NOS-UNSPEC                 |
| 73021 | OSTEOMYELITIS NOS-SHLDER                 |
| 73022 | OSTEOMYELITIS NOS-UP/ARM                 |
| 73023 | OSTEOMYELIT NOS-FOREARM                  |
| 73024 | OSTEOMYELITIS NOS-HAND                   |
| 73025 | OSTEOMYELITIS NOS-PELVIS                 |
| 73026 | OSTEOMYELITIS NOS-L/LEG                  |
| 73027 | OSTEOMYELITIS NOS-ANKLE                  |
| 73028 | OSTEOMYELIT NOS-OTH SITE                 |
| 73029 | OSTEOMYELITIS NOS-MULT                   |
| 73096 | BONE INFECT NOS-L/LEG                    |
| 73097 | BONE INFECT NOS-ANKLE                    |
| 4210  | AC/SUBAC BACT ENDOCARD                   |
| 4219  | AC/SUBAC ENDOCARDIT NOS                  |
| 361   | MENINGOCOCC ENCEPHALITIS                 |
| 3201  | PNEUMOCOCCAL MENINGITIS                  |
| 3202  | STREPTOCOCCAL MENINGITIS                 |
| 3203  | STAPHYLOCOCC MENINGITIS                  |
| 32082 | MENINGITIS GRAM-NEG BCT NEC              |

|       |                                                                            |
|-------|----------------------------------------------------------------------------|
| 32089 | MENINGITIS OTH SPCF BACT                                                   |
| 3209  | BACTERIAL MENINGITIS NOS                                                   |
| 3240  | INTRACRANIAL ABSCESS                                                       |
| 3241  | INTRASPINAL ABSCESS                                                        |
| 3249  | CNS ABSCESS NOS                                                            |
| 53641 | GASTROSTOMY INFECTION                                                      |
| 56961 | COLOSTY/ENTEROST INFECTN                                                   |
| 99660 | INFECT INFLAMM DEVICE IMPLANT GRAFT NOS                                    |
| 99661 | INFECT INFLAMM CARDIAC DEVICE IMPLANT GRAFT                                |
| 99663 | INFECT INFLAMM NERV DEVICE IMPLANT GRAFT                                   |
| 99664 | INFECT INFLAMM URINARY CATH                                                |
| 99665 | INFECT INFLAMM GU DEVICE IMPLANT GRAFT                                     |
| 99666 | INFECT INFLAMM JOINT PROSTH                                                |
| 99667 | INFECT INFLAMM OTH ORTHOP DEVICE IMPLANT GRAFT NOS                         |
| 99669 | INFECT INFLAMM OTH DEVICE IMPLANT GRAFT                                    |
| 99731 | VENTILATOR ASSOCIATED PNEUMONIA OCT08-                                     |
| 99851 | INFECTED POSTOP SEROMA                                                     |
| 99939 | INFECTION FOLLOWING OTHER INFUSION, INJECTION, TRANSFUSION, OR VACCINATION |
| 99662 | INFECT INFLAMM VASCULAR DEVICE IMPLANT GRAFT                               |
| 99668 | INFECT INFLAMM DUE TO PERITONEAL DIALYSIS CATHETER                         |
| 99931 | OTHER AND UNSPECIFIED INFECTION DUE TO CENTRAL VENOUS CATHETER OCT07-OCT11 |
| 30    | SALMONELLA ENTERITIS                                                       |
| 50    | STAPH FOOD POISONING                                                       |
| 52    | FOOD POIS D/T C. PERFRIN                                                   |
| 800   | INTEST INFEC E COLI NOS                                                    |
| 809   | INT INF E COLI NEC                                                         |
| 841   | STAPHYLOCOCC ENTERITIS                                                     |
| 842   | PSEUDOMONAS ENTERITIS                                                      |
| 843   | INT INFEC CAMPYLOBACTER                                                    |
| 844   | INT INF YRSNIA ENTRCLTCA                                                   |
| 845   | INT INF CLSTRDIUM DFCILE                                                   |
| 846   | INTES INFEC OTH ANEROBES                                                   |
| 847   | INT INF OTH GRM NEG BCTR                                                   |
| 849   | BACTERIAL ENTERITIS NEC                                                    |
| 85    | BACTERIAL ENTERITIS NOS                                                    |
| 90    | INFECTIOUS COLITIS, ENTERITIS, AND GASTROENTERITIS                         |
| 91    | COLITIS, ENTERITIS, AND GASTROENTERITIS OF PRESUMED INFECTIOUS ORIGIN      |
| 92    | INFECTIOUS DIARRHEA                                                        |
| 93    | DIARRHEA OF PRESUMED INFECTIOUS ORIGIN                                     |
| 5400  | AC APPEND W PERITONITIS                                                    |
| 5401  | ABSCESS OF APPENDIX                                                        |
| 5409  | ACUTE APPENDICITIS NOS                                                     |
| 541   | APPENDICITIS NOS                                                           |
| 542   | OTHER APPENDICITIS                                                         |

|       |                                                                                                                                  |
|-------|----------------------------------------------------------------------------------------------------------------------------------|
| 56201 | DVRTCLI SML INT W/O HMRG                                                                                                         |
| 56203 | DVRTCLI SML INT W HMRHG                                                                                                          |
| 56211 | DVRTCLI COLON W/O HMRHG                                                                                                          |
| 56213 | DVRTCLI COLON W HMRHG                                                                                                            |
| 566   | ANAL & RECTAL ABSCESS                                                                                                            |
| 5695  | INTESTINAL ABSCESS                                                                                                               |
| 5720  | ABSCESS OF LIVER                                                                                                                 |
| 5721  | PORTAL PYEMIA                                                                                                                    |
| 5750  | ACUTE CHOLECYSTITIS (W/O MENTION OF CALCULUS)                                                                                    |
| 57510 | CHOLECYSTITIS, UNSPECIFIED                                                                                                       |
| 59010 | AC PYELONEPHRITIS NOS                                                                                                            |
| 5902  | RENAL/PERIRENAL ABSCESS                                                                                                          |
| 5903  | PYELOURETERITIS CYSTICA                                                                                                          |
| 59080 | PYELONEPHRITIS NOS                                                                                                               |
| 5909  | INFECTION OF KIDNEY NOS                                                                                                          |
| 5950  | ACUTE CYSTITIS                                                                                                                   |
| 59589 | CYSTITIS NEC                                                                                                                     |
| 5959  | CYSTITIS NOS                                                                                                                     |
| 5990  | URIN TRACT INFECTION NOS                                                                                                         |
| 6010  | ACUTE PROSTATITIS                                                                                                                |
| 6012  | ABSCESS OF PROSTATE                                                                                                              |
| 6013  | PROSTATOCYSTITIS                                                                                                                 |
| 6019  | PROSTATITIS NOS                                                                                                                  |
| 6040  | ORCHITIS WITH ABSCESS                                                                                                            |
| 60490 | ORCHITIS/EPIDIDYMIT NOS                                                                                                          |
| 6071  | BALANOPOSTHITIS                                                                                                                  |
| 6140  | AC SALPINGO-OOPHORITIS OCT05-                                                                                                    |
| 6142  | SALPINGO-OOPHORITIS NOS OCT05-                                                                                                   |
| 6143  | ACUTE PARAMETRITIS OCT05-                                                                                                        |
| 6145  | AC PELV PERITONITIS-FEM OCT05-                                                                                                   |
| 6159  | UTERINE INFLAM DIS NOS OCT05-                                                                                                    |
| 6164  | ABSCESS OF VULVA NEC                                                                                                             |
| 56721 | PERITONITIS (ACUTE) GEN OCT05-                                                                                                   |
| 56722 | PERITONEAL ABSCESS OCT05-                                                                                                        |
| 56723 | SPONTAN BACT PERITONITIS OCT05-                                                                                                  |
| 56729 | SUPPURAT PERITONITIS NEC OCT05-                                                                                                  |
| 56789 | PERITONITIS NEC OCT05-                                                                                                           |
| 5679  | PERITONITIS NOS                                                                                                                  |
| 322   | SALMONELLA PNEUMONIA                                                                                                             |
| 1155  | TUBERCULOUS BRONCHIECTASIS, TUBERCLE BACILLI NOT FOUND BY BACTERIOLOGICAL EXAMINATION, BUT TUBERCULOSIS CONFIRMED HISTOLOGICALLY |
| 1190  | PULMONARY TUBERCULOSIS, UNSPECIFIED, UNSPECIFIED                                                                                 |
| 1192  | PULMONARY TUBERCULOSIS, UNSPECIFIED, BACTERIOLOGICAL OR HISTOLOGICAL EXAMINATION UNKNOWN (AT PRESENT)                            |
| 1193  | PULMONARY TUBERCULOSIS, UNSPECIFIED, TUBERCLE BACILLI FOUND (IN SPUTUM) BY MICROSCOPY                                            |
| 1194  | PULMONARY TUBERCULOSIS, UNSPECIFIED, TUBERCLE BACILLI NOT FOUND (IN SPUTUM) BY MICROSCOPY, BUT FOUND BY BACTERIAL CULTURE        |
| 1195  | PULMONARY TUBERCULOSIS, UNSPECIFIED, TUBERCLE BACILLI NOT FOUND BY                                                               |

|       |                                                                                                                                                          |
|-------|----------------------------------------------------------------------------------------------------------------------------------------------------------|
|       | BACTERIOLOGICAL EXAMINATION, BUT TUBERCULOSIS CONFIRMED HISTOLOGICALLY                                                                                   |
| 1196  | PULMONARY TUBERCULOSIS, UNSPECIFIED, TUBERCLE BACILLI NOT FOUND BY BACTERIOLOGICAL OR HISTORICAL EXAMINATION BUT TUBERCULOSIS CONFIRMED BY OTHER METHODS |
| 310   | DIS DUE TO OTHER MYCOBACTERIA: PULMONARY                                                                                                                 |
| 339   | WHOOPING COUGH NOS                                                                                                                                       |
| 391   | PULMONARY ACTINOMYCOSIS                                                                                                                                  |
| 4660  | ACUTE BRONCHITIS                                                                                                                                         |
| 481   | PNEUMOCOCCAL PNEUMONIA                                                                                                                                   |
| 4820  | K. PNEUMONIAE PNEUMONIA                                                                                                                                  |
| 4821  | PSEUDOMONAL PNEUMONIA                                                                                                                                    |
| 4822  | H.INFLUENZAE PNEUMONIA                                                                                                                                   |
| 48230 | STREPTOCOCCAL PNEUMN NOS                                                                                                                                 |
| 48231 | PNEUMONIA STREPTOCOCCUS A                                                                                                                                |
| 48239 | PNEUMONIA OTH STREP                                                                                                                                      |
| 48240 | STAPHYLOCOCCAL PNEU NOS                                                                                                                                  |
| 48241 | METHICILLIN SUSCEPTIBLE PNEUMONIA DUE TO STAPHYLOCOCCUS AUREUS OCT08-                                                                                    |
| 48242 | METHICILLIN RESISTANT PNEUMONIA DUE TO STAPHYLOCOCCUS AUREUS OCT08-                                                                                      |
| 48249 | STAPH PNEUMONIA NEC                                                                                                                                      |
| 48281 | PNEUMONIA ANAEROBES                                                                                                                                      |
| 48282 | PNEUMONIA E COLI                                                                                                                                         |
| 48283 | PNEUMO OTH GRM-NEG BACT                                                                                                                                  |
| 48284 | LEGIONNAIRES' DISEASE                                                                                                                                    |
| 48289 | PNEUMONIA OTH SPCF BACT                                                                                                                                  |
| 4829  | BACTERIAL PNEUMONIA NOS                                                                                                                                  |
| 4830  | MYCOPLASMA PNEUMONIAE                                                                                                                                    |
| 485   | BRONCHOPNEUMONIA ORG NOS                                                                                                                                 |
| 490   | BRONCHITIS                                                                                                                                               |
| 49122 | OBS CHR BRONC W AC BRONC                                                                                                                                 |
| 4941  | BRONCHIECTASIS W AC EXAC                                                                                                                                 |
| 5100  | EMPHYEMA WITH FISTULA                                                                                                                                    |
| 5109  | EMPHYEMA W/O FISTULA                                                                                                                                     |
| 5111  | BACT PLEUR/EFFUS NOT TB                                                                                                                                  |
| 5130  | ABSCESS OF LUNG                                                                                                                                          |
| 5131  | ABSCESS OF MEDIASTINUM                                                                                                                                   |
| 311   | DIS DUE TO OTHER MYCOBACTERIA: CUTANEOUS                                                                                                                 |
| 400   | GAS GANGRENE                                                                                                                                             |
| 37601 | ORBITAL CELLULITIS                                                                                                                                       |
| 6800  | CARBUNCLE OF FACE                                                                                                                                        |
| 6802  | CARBUNCLE OF TRUNK                                                                                                                                       |
| 6803  | CARBUNCLE OF ARM                                                                                                                                         |
| 6805  | CARBUNCLE OF BUTTOCK                                                                                                                                     |
| 6806  | CARBUNCLE OF LEG                                                                                                                                         |
| 6808  | CARBUNCLE, SITE NEC                                                                                                                                      |
| 6809  | CARBUNCLE NOS                                                                                                                                            |
| 68101 | FELON                                                                                                                                                    |
| 68110 | CELLULITIS, TOE NOS                                                                                                                                      |

|       |                                                                   |
|-------|-------------------------------------------------------------------|
| 6819  | CELLULITIS OF DIGIT NOS                                           |
| 6820  | CELLULITIS OF FACE                                                |
| 6821  | CELLULITIS OF NECK                                                |
| 6822  | CELLULITIS OF TRUNK                                               |
| 6823  | CELLULITIS OF ARM                                                 |
| 6824  | CELLULITIS OF HAND                                                |
| 6825  | CELLULITIS OF BUTTOCK                                             |
| 6826  | CELLULITIS OF LEG                                                 |
| 6827  | CELLULITIS OF FOOT                                                |
| 6828  | CELLULITIS, SITE NEC                                              |
| 6829  | CELLULITIS, SITE NOS                                              |
| 6850  | PILONIDAL CYST WITH ABSCESS                                       |
| 6868  | LOCAL SKIN INFECTION NEC                                          |
| 6869  | LOCAL SKIN INFECTION NOS                                          |
| 72886 | NECROTIZING FASCIITIS                                             |
| 323   | SALMONELLA ARTHRITIS                                              |
| 324   | SALMONELLA OSTEOMYELITIS                                          |
| 3682  | MENINGOCOCC ARTHROPATHY                                           |
| 37603 | ORBITAL OSTEOMYELITIS                                             |
| 71140 | ARTHROPATHY ASSOC WITH OTH BACTERIALDISEASE-UNSPEC                |
| 71141 | ARTHROPATHY ASSOC WITH OTH BACTERIAL DISEASE-SHLDER               |
| 71142 | ARTHROPATHY ASSOC WITH OTH BACTERIAL DISEASE-UP/ARM               |
| 71143 | ARTHROPATHY ASSOC WITH OTH BACTERIAL DISEASE-FOREARM              |
| 71144 | ARTHROPATHY ASSOC WITH OTH BACTERIAL DISEASEPYOGEN ARTHRITIS-HAND |
| 71145 | ARTHROPATHY ASSOC WITH OTH BACTERIAL DISEASE-PELVIS               |
| 71146 | ARTHROPATHY ASSOC WITH OTH BACTERIAL DISEASE-L/LEG                |
| 71147 | ARTHROPATHY ASSOC WITH OTH BACTERIAL DISEASE-ANKLE                |
| 71148 | ARTHROPATHY ASSOC WITH OTH BACTERIAL DISEASE NEC                  |
| 71149 | ARTHROPATHY ASSOC WITH OTH BACTERIAL DISEASE-MULT                 |
| 71190 | INF ARTHRITIS NOS-UNSPEC                                          |
| 71194 | INF ARTHRIT NOS-HAND                                              |
| 71196 | INF ARTHRIT NOS-L/LEG                                             |
| 71198 | INF ARTHRIT NOS-OTH SITE                                          |
| 71199 | INF ARTHRITIS NOS-MULT                                            |
| 73000 | AC OSTEOMYELITIS-UNSPEC                                           |
| 73003 | AC OSTEOMYELITIS-FOREARM                                          |
| 73009 | AC OSTEOMYELITIS-MULT                                             |
| 73080 | BONE INFECT NEC-UNSPEC                                            |
| 73081 | BONE INFECT NEC-SHLDER                                            |
| 73082 | BONE INFECT NEC-UP/ARM                                            |
| 73083 | BONE INFECT NEC-FOREARM                                           |
| 73084 | BONE INFECT NEC-HAND                                              |
| 73085 | BONE INFECT NEC-PELVIS                                            |
| 73086 | BONE INFECT NEC-L/LEG                                             |
| 73087 | BONE INFECT NEC-ANKLE                                             |
| 73088 | BONE INFECT NEC-OTH SITE                                          |
| 73089 | BONE INFECT NEC-MULT                                              |
| 73090 | BONE INFEC NOS-UNSP SITE                                          |



|       |                                                                               |
|-------|-------------------------------------------------------------------------------|
| 73091 | BONE INFECT NOS-SHLDER                                                        |
| 73092 | BONE INFECT NOS-UP/ARM                                                        |
| 73093 | BONE INFECT NOS-FOREARM                                                       |
| 73094 | BONE INFECT NOS-HAND                                                          |
| 73095 | BONE INFECT NOS-PELVIS                                                        |
| 73098 | BONE INFECT NOS-OTH SITE                                                      |
| 73099 | BONE INFECT NOS-MULT                                                          |
| 3282  | DIPHTherITIC MYOCARDITIS                                                      |
| 3640  | MENINGOCOCC CARDITIS NOS                                                      |
| 3641  | MENINGOCOCC PERICARDITIS                                                      |
| 3642  | MENINGOCOCC ENDOCARDITIS                                                      |
| 3643  | MENINGOCOCC MYOCARDITIS                                                       |
| 3910  | ACUTE RHEUMATIC PERICARDITIS                                                  |
| 3911  | ACUTE RHEUMATIC ENDOCARDITIS                                                  |
| 3912  | ACUTE RHEUMATIC MYOCARDITIS                                                   |
| 3918  | OTHER RHEUMATIC HEART DISEASE                                                 |
| 3919  | ACUTE RHEUMATIC HEART DISEASE, UNSPEC                                         |
| 3920  | RHEUMATIC CHOREA WITH HEART INVOLVEMENT                                       |
| 4211  | AC/SUBAC INFECT ENDOCARD                                                      |
| 4220  | ACUTE MYOCARDITIS IN DIS SPECIFIED ELSEWHERE                                  |
| 42292 | SEPTIC MYOCARDITIS                                                            |
| 321   | SALMONELLA MENINGITIS                                                         |
| 360   | MENINGOCOCCAL MENINGITIS                                                      |
| 3200  | HEMOPHILUS MENINGITIS                                                         |
| 3207  | MENING IN OTH BACT DIS                                                        |
| 32081 | ANAEROBIC MENINGITIS                                                          |
| 53086 | INFECTION OF ESOPHAGOSTOMY                                                    |
| 53901 | INFECTION DUE TO GASTRIC BAND SURGERY OCT11-                                  |
| 53981 | INFECTION DUE TO OTHER BARIATRIC PROCEDURE OCT11-                             |
| 99802 | POSTOPERATIVE SHOCK, SEPTIC                                                   |
| 99859 | OTHER POSTOP INFECTION                                                        |
| 99934 | ACUTE INFECTION FOLLOWING TRANSFUSION,INFUSION, OR INJECTION BLOOD/PROD OCT11 |
| 99932 | BLOODSTREAM INFECTION DUE TO CENTRAL VENOUS CATHETER OCT11-                   |
| 99933 | LOCAL INFECTION DUE TO CENTRAL VENOUS CATHETER OCT11-                         |
| 38    | SALMONELLA INFECTION NEC                                                      |
| 39    | SALMONELLA INFECTION NOS                                                      |
| 40    | SHIGELLA DYSENTERIAE                                                          |
| 41    | SHIGELLA FLEXNERI                                                             |
| 43    | SHIGELLA SONNEI                                                               |
| 48    | SHIGELLA INFECTION NEC                                                        |
| 49    | SHIGELLOSIS NOS                                                               |
| 51    | BOTULISM                                                                      |
| 53    | FOOD POIS: CLOSTRID NEC                                                       |
| 54    | FOOD POIS: V. PARAHAEM                                                        |
| 581   | FOOD POISN D/T V. VULNIF                                                      |
| 589   | BACT FOOD POISONING NEC                                                       |
| 59    | FOOD POISONING NOS                                                            |
| 801   | INT INF E COLI ENTRPATH                                                       |

|       |                                                                                                                                                         |
|-------|---------------------------------------------------------------------------------------------------------------------------------------------------------|
| 802   | INT INF E COLI ENTEROTOXIGENIC                                                                                                                          |
| 803   | INT INF E COLI ENTEROINVASIVE                                                                                                                           |
| 804   | INT INF E COLI ENTEROHEMORRHAGIC                                                                                                                        |
| 81    | ARIZONA ENTERITIS                                                                                                                                       |
| 82    | AEROBACTER ENTERITIS                                                                                                                                    |
| 83    | PROTEUS ENTERITIS                                                                                                                                       |
| 392   | ACTINOMYCOTIC INFECTIONS – ABDOMEN                                                                                                                      |
| 3284  | DIPHThERITIC CYSTITIS                                                                                                                                   |
| 59011 | AC PYELONEPHR W MED NECR                                                                                                                                |
| 59081 | PYELONEPHRIT IN OTH DIS                                                                                                                                 |
| 5954  | CYSTITIS IN OTH DIS                                                                                                                                     |
| 5970  | URETHRAL ABSCESS                                                                                                                                        |
| 59800 | URETHRAL STRICTURE DUE TO UNSPEC INFECTION                                                                                                              |
| 59801 | URETHRAL INFECTION DUE TO INFECTION CLASSIFIED ELSEWHERE                                                                                                |
| 6014  | PROSTATITIS IN OTH DIS                                                                                                                                  |
| 6031  | INFECTED HYDROCELE                                                                                                                                      |
| 60491 | ORCHITIS IN OTH DISEASE                                                                                                                                 |
| 6080  | SEMINAL VESICULITIS                                                                                                                                     |
| 6163  | BARTHOLIN'S GLND ABSCESS                                                                                                                                |
| 3283  | DIPHThERITIC PERITONITIS                                                                                                                                |
| 5670  | PERITONITIS IN INFEC DIS                                                                                                                                |
| 5671  | PNEUMOCOCCAL PERITONITIS                                                                                                                                |
| 5672  | SUPPURAT PERITONITIS NEC                                                                                                                                |
| 1100  | TUBERCULOSIS OF LUNG, INFILTRATIVE, UNSPECIFIED                                                                                                         |
| 1101  | TUBERCULOSIS OF LUNG, INFILTRATIVE, BACTERIOLOGICAL OR HISTOLOGICAL EXAMINATION NOT DONE                                                                |
| 1102  | TUBERCULOSIS OF LUNG, INFILTRATIVE, BACTERIOLOGICAL OR HISTOLOGICAL EXAMINATION UNKNOWN (AT PRESENT)                                                    |
| 1103  | TUBERCULOSIS OF LUNG, INFILTRATIVE, TUBERCLE BACILLI FOUND (IN SPUTUM) BY MICROSCOPY                                                                    |
| 1104  | TUBERCULOSIS OF LUNG, INFILTRATIVE, TUBERCLE BACILLI NOT FOUND (IN SPUTUM) BY MICROSCOPY, BUT FOUND BY BACTERIAL CULTURE                                |
| 1105  | TUBERCULOSIS OF LUNG, INFILTRATIVE, TUBERCLE BACILLI NOT FOUND BY BACTERIOLOGICAL EXAMINATION, BUT TUBERCULOSIS CONFIRMED HISTOLOGICALLY                |
| 1106  | TUBERCULOSIS OF LUNG, INFILTRATIVE, TUBERCLE BACILLI NOT FOUND BY BACTERIOLOGICAL OR HISTORICAL EXAMINATION BUT TUBERCULOSIS CONFIRMED BY OTHER METHODS |
| 1110  | TUBERCULOSIS OF LUNG, NODULAR, UNSPECIFIED                                                                                                              |
| 1111  | TUBERCULOSIS OF LUNG, NODULAR, BACTERIOLOGICAL OR HISTOLOGICAL EXAMINATION NOT DONE                                                                     |
| 1112  | TUBERCULOSIS OF LUNG, NODULAR, BACTERIOLOGICAL OR HISTOLOGICAL EXAMINATION UNKNOWN (AT PRESENT)                                                         |
| 1113  | TUBERCULOSIS OF LUNG, NODULAR, TUBERCLE BACILLI FOUND (IN SPUTUM) BY MICROSCOPY                                                                         |
| 1114  | TUBERCULOSIS OF LUNG, NODULAR, TUBERCLE BACILLI NOT FOUND (IN SPUTUM) BY MICROSCOPY, BUT FOUND BY BACTERIAL CULTURE                                     |
| 1115  | TUBERCULOSIS OF LUNG, NODULAR, TUBERCLE BACILLI NOT FOUND BY BACTERIOLOGICAL EXAMINATION, BUT TUBERCULOSIS CONFIRMED HISTOLOGICALLY                     |
| 1116  | TUBERCULOSIS OF LUNG, NODULAR, TUBERCLE BACILLI NOT FOUND BY BACTERIOLOGICAL OR HISTORICAL EXAMINATION BUT TUBERCULOSIS CONFIRMED BY OTHER METHODS      |

|      |                                                                                                                                                              |
|------|--------------------------------------------------------------------------------------------------------------------------------------------------------------|
| 1120 | TUBERCULOSIS OF LUNG, WITH CAVITATION, UNSPECIFIED                                                                                                           |
| 1121 | TUBERCULOSIS OF LUNG, WITH CAVITATION, BACTERIOLOGICAL OR HISTOLOGICAL EXAMINATION NOT DONE                                                                  |
| 1122 | TUBERCULOSIS OF LUNG, WITH CAVITATION, BACTERIOLOGICAL OR HISTOLOGICAL EXAMINATION UNKNOWN (AT PRESENT)                                                      |
| 1123 | TUBERCULOSIS OF LUNG, WITH CAVITATION, TUBERCLE BACILLI FOUND (IN SPUTUM) BY MICROSCOPY                                                                      |
| 1124 | TUBERCULOSIS OF LUNG, WITH CAVITATION, TUBERCLE BACILLI NOT FOUND (IN SPUTUM) BY MICROSCOPY, BUT FOUND BY BACTERIAL CULTURE                                  |
| 1125 | TUBERCULOSIS OF LUNG, WITH CAVITATION, TUBERCLE BACILLI NOT FOUND BY BACTERIOLOGICAL EXAMINATION, BUT TUBERCULOSIS CONFIRMED HISTOLOGICALLY                  |
| 1126 | TUBERCULOSIS OF LUNG, WITH CAVITATION, TUBERCLE BACILLI NOT FOUND BY BACTERIOLOGICAL OR HISTOLOGICAL EXAMINATION BUT TUBERCULOSIS CONFIRMED BY OTHER METHODS |
| 1130 | TUBERCULOSIS OF BRONCHUS, UNSPECIFIED                                                                                                                        |
| 1131 | TUBERCULOSIS OF BRONCHUS, BACTERIOLOGICAL OR HISTOLOGICAL EXAMINATION NOT DONE                                                                               |
| 1132 | TUBERCULOSIS OF BRONCHUS , BACTERIOLOGICAL OR HISTOLOGICAL EXAMINATION UNKNOWN (AT PRESENT)                                                                  |
| 1133 | TUBERCULOSIS OF BRONCHUS, TUBERCLE BACILLI FOUND (IN SPUTUM) BY MICROSCOPY                                                                                   |
| 1134 | TUBERCULOSIS OF BRONCHUS, TUBERCLE BACILLI NOT FOUND (IN SPUTUM) BY MICROSCOPY, BUT FOUND BY BACTERIAL CULTURE                                               |
| 1135 | TUBERCULOSIS OF BRONCHUS, TUBERCLE BACILLI NOT FOUND BY BACTERIOLOGICAL EXAMINATION, BUT TUBERCULOSIS CONFIRMED HISTOLOGICALLY                               |
| 1136 | TUBERCULOSIS OF BRONCHUS, TUBERCLE BACILLI NOT FOUND BY BACTERIOLOGICAL OR HISTOLOGICAL EXAMINATION BUT TUBERCULOSIS CONFIRMED BY OTHER METHODS              |
| 1150 | TUBERCULOUS BRONCHIECTASIS, UNSPECIFIED                                                                                                                      |
| 1151 | TUBERCULOUS BRONCHIECTASIS, BACTERIOLOGICAL OR HISTOLOGICAL EXAMINATION NOT DONE                                                                             |
| 1152 | TUBERCULOUS BRONCHIECTASIS, BACTERIOLOGICAL OR HISTOLOGICAL EXAMINATION UNKNOWN (AT PRESENT)                                                                 |
| 1153 | TUBERCULOUS BRONCHIECTASIS, TUBERCLE BACILLI FOUND (IN SPUTUM) BY MICROSCOPY                                                                                 |
| 1154 | TUBERCULOUS BRONCHIECTASIS, TUBERCLE BACILLI NOT FOUND (IN SPUTUM) BY MICROSCOPY, BUT FOUND BY BACTERIAL CULTURE                                             |
| 1156 | TUBERCULOUS BRONCHIECTASIS, TUBERCLE BACILLI NOT FOUND BY BACTERIOLOGICAL OR HISTOLOGICAL EXAMINATION BUT TUBERCULOSIS CONFIRMED BY THER METHODS             |
| 1160 | TUBERCULOUS PNEUMONIA [ANY FORM], UNSPECIFIED                                                                                                                |
| 1161 | TUBERCULOUS PNEUMONIA [ANY FORM], BACTERIOLOGICAL OR HISTOLOGICAL EXAMINATION NOT DONE                                                                       |
| 1162 | TUBERCULOUS PNEUMONIA [ANY FORM], BACTERIOLOGICAL OR HISTOLOGICAL EXAMINATION UNKNOWN (AT PRESENT)                                                           |
| 1163 | TUBERCULOUS PNEUMONIA [ANY FORM], TUBERCLE BACILLI FOUND (IN SPUTUM) BY MICROSCOPY                                                                           |
| 1164 | TUBERCULOUS PNEUMONIA [ANY FORM], TUBERCLE BACILLI NOT FOUND (IN SPUTUM) BY MICROSCOPY, BUT FOUND BY BACTERIAL CULTURE                                       |
| 1165 | TUBERCULOUS PNEUMONIA [ANY FORM], TUBERCLE BACILLI NOT FOUND BY BACTERIOLOGICAL EXAMINATION, BUT TUBERCULOSIS CONFIRMED HISTOLOGICALLY                       |
| 1166 | TUBERCULOUS PNEUMONIA [ANY FORM], TUBERCLE BACILLI NOT FOUND BY BACTERIOLOGICAL OR HISTOLOGICAL EXAMINATION BUT TUBERCULOSIS CONFIRMED BY OTHER METHODS]     |

|       |                                                                                                                                                               |
|-------|---------------------------------------------------------------------------------------------------------------------------------------------------------------|
| 1170  | TUBERCULOUS PNEUMOTHORAX, UNSPECIFIED                                                                                                                         |
| 1171  | TUBERCULOUS PNEUMOTHORAX, BACTERIOLOGICAL OR HISTOLOGICAL EXAMINATION NOT DONE                                                                                |
| 1172  | TUBERCULOUS PNEUMOTHORAX, BACTERIOLOGICAL OR HISTOLOGICAL EXAMINATION UNKNOWN (AT PRESENT)                                                                    |
| 1173  | TUBERCULOUS PNEUMOTHORAX, TUBERCLE BACILLI FOUND (IN SPUTUM) BY MICROSCOPY                                                                                    |
| 1174  | TUBERCULOUS PNEUMOTHORAX, TUBERCLE BACILLI NOT FOUND (IN SPUTUM) BY MICROSCOPY, BUT FOUND BY BACTERIAL CULTURE                                                |
| 1175  | TUBERCULOUS PNEUMOTHORAX, TUBERCLE BACILLI NOT FOUND BY BACTERIOLOGICAL EXAMINATION, BUT TUBERCULOSIS CONFIRMED HISTOLOGICALLY                                |
| 1176  | TUBERCULOUS PNEUMOTHORAX, TUBERCLE BACILLI NOT FOUND BY BACTERIOLOGICAL OR HISTOLOGICAL EXAMINATION BUT TUBERCULOSIS CONFIRMED BY OTHER METHODS               |
| 1180  | OTHER SPECIFIED PULMONARY TUBERCULOSIS, UNSPECIFIED                                                                                                           |
| 1181  | OTHER SPECIFIED PULMONARY TUBERCULOSIS, BACTERIOLOGICAL OR HISTOLOGICAL EXAMINATION NOT DONE                                                                  |
| 1182  | OTHER SPECIFIED PULMONARY TUBERCULOSIS, BACTERIOLOGICAL OR HISTOLOGICAL EXAMINATION UNKNOWN (AT PRESENT)                                                      |
| 1183  | OTHER SPECIFIED PULMONARY TUBERCULOSIS, TUBERCLE BACILLI FOUND (IN SPUTUM) BY MICROSCOPY                                                                      |
| 1184  | OTHER SPECIFIED PULMONARY TUBERCULOSIS, TUBERCLE BACILLI NOT FOUND (IN SPUTUM) BY MICROSCOPY, BUT FOUND BY BACTERIAL CULTURE                                  |
| 1185  | OTHER SPECIFIED PULMONARY TUBERCULOSIS, TUBERCLE BACILLI NOT FOUND BY BACTERIOLOGICAL EXAMINATION, BUT TUBERCULOSIS CONFIRMED HISTOLOGICALLY                  |
| 1186  | OTHER SPECIFIED PULMONARY TUBERCULOSIS, TUBERCLE BACILLI NOT FOUND BY BACTERIOLOGICAL OR HISTOLOGICAL EXAMINATION BUT TUBERCULOSIS CONFIRMED BY OTHER METHODS |
| 1191  | PULMONARY TUBERCULOSIS, UNSPECIFIED, BACTERIOLOGICAL OR HISTOLOGICAL EXAMINATION NOT DONE                                                                     |
| 330   | BORDETELLA PERTUSSIS                                                                                                                                          |
| 338   | WHOOPING COUGH NEC                                                                                                                                            |
| 730   | ORNITHOSIS WITH PNEUMONIA                                                                                                                                     |
| 48232 | PNEUMONIA STREPTOCOCCUS B                                                                                                                                     |
| 4831  | CHLAMYDIA PNEUMONIA                                                                                                                                           |
| 4838  | PNEUMONIA DUE TO OTHER SPECIFIED ORGANISM                                                                                                                     |
| 4843  | PNEUMONIA IN WHOOPING COUGH                                                                                                                                   |
| 4848  | PNEUMONIA IN OTHER INF DIS                                                                                                                                    |
| 486   | PNEUMONIA, ORGANISM NOS                                                                                                                                       |
| 5192  | MEDIASTINITIS                                                                                                                                                 |
| 3285  | CUTANEOUS DIPHTHERIA                                                                                                                                          |
| 390   | CUTANEOUS ACTINOMYCOSIS                                                                                                                                       |
| 6801  | CARBUNCLE OF NECK                                                                                                                                             |
| 6804  | CARBUNCLE OF HAND                                                                                                                                             |
| 6807  | CARBUNCLE OF FOOT                                                                                                                                             |
| 68100 | CELLULITIS, FINGER NOS                                                                                                                                        |
| 68111 | ONYCHIA OF TOE                                                                                                                                                |
| 684   | IMPETIGO                                                                                                                                                      |

Supplemental Table 1 B Cardiovascular ICD 9 Procedure codes:

| <b>PROC</b> | <b>Description</b>                                             |
|-------------|----------------------------------------------------------------|
| 0.6         | Insertion of drug-eluting stent of superficial femoral artery  |
| 0.61        | Percutaneous angioplasty of extracranial vessels               |
| 0.62        | Percutaneous angioplasty of intracranial vessels               |
| 0.63        | Percutaneous insertion of carotid artery stents                |
| 0.64        | Percutaneous insertion of other extracranial artery stents     |
| 0.65        | Percutaneous insertion of intracranial vascular stents         |
| 0.66        | PTCA                                                           |
| 17.53       | Percutaneous atherectomy of extracranial vessel(s)             |
| 17.54       | Percutaneous atherectomy of intracranial vessel(s)             |
| 17.55       | Transluminal coronary atherectomy                              |
| 36.03       | Open chest coronary artery angioplasty                         |
| 36.04       | Intracoronary artery thrombolytic infusion                     |
| 36.06       | Insertion of non-drug-eluting coronary artery stent(s)         |
| 36.07       | Insertion of drug-eluting coronary artery stent(s)             |
| 36.09       | Other removal of coronary artery obstruction                   |
| 36.1        | Aortocoronary bypass for heart revascularization, not otherwis |
| 36.11       | (Aorto)coronary bypass of one coronary artery                  |
| 36.12       | (Aorto)coronary bypass of two coronary arteries                |
| 36.13       | (Aorto)coronary bypass of three coronary arteries              |
| 36.14       | (Aorto)coronary bypass of four or more coronary arteries       |
| 36.15       | Single internal mammary-coronary artery bypass                 |
| 36.16       | Double internal mammary-coronary artery bypass                 |

|       |                                                      |
|-------|------------------------------------------------------|
| 36.17 | Abdominal - coronary artery bypass                   |
| 36.19 | Other bypass anastomosis for heart revascularization |
| 36.2  | Heart revascularization by arterial implant          |
| 36.3  | Other heart revascularization                        |
| 36.31 | Open chest transmyocardial revascularization         |
| 36.32 | Other transmyocardial revascularization              |
| 36.33 | Endoscopic transmyocardial revascularization         |
| 36.34 | Percutaneous transmyocardial revascularization       |
| 38.14 | Endarterectomy, aorta                                |
| 38.15 | Endarterectomy, other thoracic vessels               |
| 38.16 | Endarterectomy, abdominal arteries                   |
| 38.18 | Endarterectomy, lower limb arteries                  |
| 39.22 | Aorta-subclavian-carotid bypass                      |
| 39.24 | Aorta-renal bypass                                   |
| 39.25 | Aorta-iliac-femoral bypass                           |
| 39.26 | Other intra-abdominal vascular shunt or bypass       |
| 39.28 | Extracranial-intracranial (EC-IC) vascular bypass    |

Table 1 C Cardiovascular ICD 9 Diagnosis codes

| icd9  | Description                                                    |
|-------|----------------------------------------------------------------|
| 4111  | Intermediate coronary artery syndrome                          |
| 41181 | Acute coronary occlusion without myocardial infarction         |
| 41000 | AMI, anterolateral wall, episode unspecified                   |
| 41001 | AMI, anterolateral wall, initial episode of care               |
| 41002 | AMI, anterolateral wall, subsequent episode without recurrence |
| 41010 | AMI, of other anterior wall, episode unspecified               |
| 41011 | AMI, of other anterior wall, initial episode of care           |

|       |                                                                                     |
|-------|-------------------------------------------------------------------------------------|
| 41012 | AMI, of other anterior wall, subsequent episode without recurrence                  |
| 41020 | AMI, of inferolateral wall, episode unspecified                                     |
| 41021 | AMI, of inferolateral wall initial episode of care                                  |
| 41022 | AMI, of inferolateral wall, subsequent episode without recurrence                   |
| 41030 | AMI, of inferoposterior wall, episode unspecified                                   |
| 41031 | AMI, of inferoposterior wall, initial episode of care                               |
| 41032 | AMI, of inferoposterior wall, subsequent episode without recurrence                 |
| 41040 | AMI, of other inferior wall, episode unspecified                                    |
| 41041 | AMI, of other inferior wall, initial episode of care                                |
| 41042 | AMI, of other inferior wall, subsequent episode without recurrence                  |
| 41050 | AMI, of other lateral wall, episode unspecified                                     |
| 41051 | AMI, of other lateral wall, initial episode of care                                 |
| 41052 | AMI, of other lateral wall, subsequent episode without recurrence                   |
| 41060 | AMI, true posterior wall infarction, episode unspecified                            |
| 41061 | AMI, true posterior wall infarction, initial episode of care                        |
| 41062 | AMI, true posterior wall infarction, subsequent episode without recurrence          |
| 41070 | AMI, subendocardial infarction, episode unspecified                                 |
| 41071 | AMI, subendocardial infarction, initial episode of care                             |
| 41072 | AMI, subendocardial infarction, subsequent episode without recurrence               |
| 41080 | AMI, of other specified sites, episode unspecified                                  |
| 41081 | AMI, of other specified sites, initial episode of care                              |
| 41082 | AMI, of other specified sites, subsequent episode without recurrence                |
| 41090 | AMI, unspecified site, episode unspecified                                          |
| 41091 | AMI, unspecified site, initial episode of care                                      |
| 41092 | AMI, unspecified site, subsequent episode without recurrence                        |
| 4130  | Angina decubitus                                                                    |
| 4131  | Prinzmetal angina                                                                   |
| 4139  | Other and unspecified angina pectoris                                               |
| 43301 | Occlusion and stenosis of precerebral arteries, basilar, with infarction            |
| 43311 | Occlusion and stenosis of precerebral arteries, caortid, with infarction            |
| 43321 | Occlusion and stenosis of precerebral arteries, vertebral, with infarction          |
| 43331 | Occlusion and stenosis of precerebral arteries, mult and bilateral, with infarction |

|       |                                                                              |
|-------|------------------------------------------------------------------------------|
| 43381 | Occlusion and stenosis of precerebral arteries, other, with infarction       |
| 43391 | Occlusion and stenosis of precerebral arteries, unspecified, with infarction |
| 43401 | Occlusion of cerebral arteries, cerebral thrombosis, with infarction         |
| 43411 | Occlusion of cerebral arteries, cerebral embolism, with infarction           |
| 43491 | Occlusion of cerebral arteries, unspecified, with infarction                 |
| 4350  | Transient cerebral ischemia, basilar artery syndrome                         |
| 4351  | Transient cerebral ischemia, vertebral artery syndrome                       |
| 4352  | Transient cerebral ischemia, subclavian steal syndrome                       |
| 4353  | Transient cerebral ischemia, vertebrobasilar artery syndrome                 |
| 4358  | Transient cerebral ischemia, other                                           |
| 4359  | Transient cerebral ischemia, unspecified                                     |
| 436   | Acute, but ill-defined cerebrovascular disease                               |



Supplemental Table 2:

Range and assay COV of biomarkers measured

| Protein            | Range                  | Intra assay<br>COV | Inter assay COV |
|--------------------|------------------------|--------------------|-----------------|
| Apo A I            | 6.5 - 239 mg/dL        | 3.32               | COV 3.33        |
| Apo B              | 13.5-174 mg/dL         | 2.60               | 3.21            |
| Apo C II           | 0-10 mg/dL             | 1.35               | 1.35            |
| Apo C III          | 0-22 mg/dL             | 2.43               | 3.65            |
| HDL Cholesterol    | 1.55 - 144 mg/dL       | 2.12               | 2.65            |
| LDL Cholesterol    | 6.97 mg/dL - 860 mg/dL | 1.87               | 2.10            |
| Triglycerides      | 11.4 - 1120 mg/dL      | 2.27               | 2.47            |
| C Reactive Protein | 0.08 - 160 mg/L        | 5.17               | 5.61            |
| Albumin            |                        | 2.6                | 3.21            |

Supplemental Table 3: Relationship between apolipoproteins A1 and C3 with mortality

by quartile

| Univariable |                |              |              |              |        |          | Multivariable |              |              |       |          |
|-------------|----------------|--------------|--------------|--------------|--------|----------|---------------|--------------|--------------|-------|----------|
| Variable    | Value          | Hazard Ratio | Lower 95% CI | Upper 95% CI | P-     | Type 3 P | Hazard Ratio  | Lower 95% CI | Upper 95% CI | P     | Type 3 P |
| Apo C 3     | Q1:<=9.01      | 1            |              |              |        | 0.019    | 1             |              |              |       | 0.15     |
|             | Q2:9.02-11.96  | 0.826        | 0.495        | 1.377        | 0.46   |          | 0.887         | 0.51         | 1.543        | 0.67  |          |
|             | Q3:11.97-14.67 | 0.49         | 0.254        | 0.946        | 0.033  |          | 0.476         | 0.229        | 0.989        | 0.047 |          |
|             | Q4:>14.67      | 0.424        | 0.229        | 0.782        | 0.006  |          | 0.601         | 0.312        | 1.158        | 0.13  |          |
| Apo A 1     | Q1:<=91        | 1            |              |              |        | 0.022    | 1             |              |              |       | 0.085    |
|             | Q2:92-108      | 0.398        | 0.204        | 0.775        | 0.0068 |          | 0.436         | 0.217        | 0.879        | 0.02  |          |
|             | Q3:109-129     | 0.599        | 0.334        | 1.072        | 0.084  |          | 0.698         | 0.372        | 1.309        | 0.26  |          |
|             | Q4:>129        | 0.444        | 0.242        | 0.815        | 0.0088 |          | 0.472         | 0.225        | 0.991        | 0.047 |          |

**Supplemental Table 4:** Association between lipoproteins and infection-related hospitalization or mortality among subjects in whom percent fat mass was measured

| Variable                                                                                                                                                                                                                                                                                                                                                                                            | Univariate models |         | Multivariable models |         |
|-----------------------------------------------------------------------------------------------------------------------------------------------------------------------------------------------------------------------------------------------------------------------------------------------------------------------------------------------------------------------------------------------------|-------------------|---------|----------------------|---------|
|                                                                                                                                                                                                                                                                                                                                                                                                     | HR (95% CI)       | P-value | HR (95% CI)          | P-value |
| Apo A1, per 10 mg/dL                                                                                                                                                                                                                                                                                                                                                                                | 0.97 (0.92, 1.01) | 0.17    | 0.97 (0.92, 1.03)    | 0.33    |
| Apo B, per 10 mg/dL                                                                                                                                                                                                                                                                                                                                                                                 | 0.93 (0.87, 0.99) | 0.03    | 0.93 (0.86, 1.0)     | 0.06    |
| Apo C2, mg/dL                                                                                                                                                                                                                                                                                                                                                                                       | 0.94 (0.88, 1.01) | 0.08    | 0.93 (0.89, 1.01)    | 0.090   |
| Apo C3, mg/dL                                                                                                                                                                                                                                                                                                                                                                                       | 0.98 (0.95, 1.01) | 0.20    | 0.97 (0.94, 1.01)    | 0.14    |
| HDL, per 10 mg/dL                                                                                                                                                                                                                                                                                                                                                                                   | 1.0 (0.91, 1.11)  | 0.94    | 0.99 (0.88, 1.13)    | 0.92    |
| LDL, per 10 mg/dL                                                                                                                                                                                                                                                                                                                                                                                   | 0.93 (0.87, 1.00) | 0.04    | 0.92 (0.85, 0.99)    | 0.025   |
| Log TG, mg/dL                                                                                                                                                                                                                                                                                                                                                                                       | 0.95 (0.73, 1.20) | 0.66    | 0.99 (0.74, 1.33)    | 0.96    |
| <p>*Each multivariable model includes the lipoprotein of interest and is adjusted for age, sex, race, percent fat, diabetes, heart failure, dialysis catheter, serum albumin and log CRP.<br/> Apolipoprotein A1 (Apo A 1), apolipoprotein B (Apo B), apolipoprotein C2 (Apo C2), Apolipoprotein C2 (Apo C3), high density lipoprotein (HDL), low density lipoprotein (LDL), triglyceride (TG).</p> |                   |         |                      |         |

**Supplemental Table 5:** Association between lipoproteins and cardiovascular hospitalization or mortality among subjects in whom percent fat mass was measured

| Variable                                                                                                                                                                                                                                                                                                                                                                                            | Univariate models |         | Multivariable models |         |
|-----------------------------------------------------------------------------------------------------------------------------------------------------------------------------------------------------------------------------------------------------------------------------------------------------------------------------------------------------------------------------------------------------|-------------------|---------|----------------------|---------|
|                                                                                                                                                                                                                                                                                                                                                                                                     | HR (95% CI)       | P-value | HR (95% CI)          | P-value |
| Apo A1, per 10 mg/dL                                                                                                                                                                                                                                                                                                                                                                                | 0.93 (0.84, 1.02) | 0.11    | 0.98 (0.88, 1.09)    | 0.69    |
| Apo B, per 10 mg/dL                                                                                                                                                                                                                                                                                                                                                                                 | 0.90 (0.79, 1.04) | 0.15    | 0.99 (0.86, 1.14)    | 0.94    |
| Apo C2, mg/dL                                                                                                                                                                                                                                                                                                                                                                                       | 0.94 (0.84, 1.06) | 0.31    | 0.99 (0.88, 1.11)    | 0.83    |
| Apo C3, mg/dL                                                                                                                                                                                                                                                                                                                                                                                       | 0.98 (0.93, 1.04) | 0.59    | 1.01 (0.95, 1.07)    | 0.86    |
| HDL, per 10 mg/dL                                                                                                                                                                                                                                                                                                                                                                                   | 0.94 (0.80, 1.21) | 0.51    | 1.02 (0.81, 1.29)    | 0.87    |
| LDL, per 10 mg/dL                                                                                                                                                                                                                                                                                                                                                                                   | 0.90 (0.77, 1.05) | 1.0     | 0.87 (0.87, 1.15)    | 0.99    |
| Log TG, mg/dL                                                                                                                                                                                                                                                                                                                                                                                       | 0.95 (0.73, 1.20) | 0.66    | 1.04 (0.63, 1.71)    | 0.88    |
| <p>*Each multivariable model includes the lipoprotein of interest and is adjusted for age, sex, race, percent fat, diabetes, heart failure, dialysis catheter, serum albumin and log CRP.<br/> Apolipoprotein A1 (Apo A 1), apolipoprotein B (Apo B), apolipoprotein C2 (Apo C2), Apolipoprotein C2 (Apo C3), high density lipoprotein (HDL), low density lipoprotein (LDL), triglyceride (TG).</p> |                   |         |                      |         |

Supplemental **Table 6:** Association between lipoproteins and all-cause mortality among subjects in whom percent fat mass was measured

| Variable                                                | Univariate models     |         | Multivariable models |         |
|---------------------------------------------------------|-----------------------|---------|----------------------|---------|
|                                                         | HR (95% CI)           | P-value | HR (95% CI)          | P-value |
| Apo A1, per 10 mg/dL                                    | 0.64 (0.47, 0.86)     | 0.004   | 0.78 (0.52, 1.15)    | 0.21    |
| Apo A1 squared, per 10 mg <sup>2</sup> /dL <sup>2</sup> | 1.01 (1.00, 1.03)     | 0.007   | 1.00 (0.99, 1.02)    | 0.22    |
| Apo B, per 10 mg/dL                                     | 0.83 (0.74, 0.93)     | 0.001   | 0.88 (0.79, 0.98)    | 0.02    |
| Apo C2, per mg/dL                                       | 0.89 (0.81, 0.98)     | 0.02    | 0.92 (0.82, 1.03)    | 0.15    |
| Apo C3, per mg/dL                                       | 0.86 (0.78, 0.93)     | <0.001  | 0.88 (0.80, 0.96)    | 0.006   |
| Apo C3 squared, per 10 mg <sup>2</sup> /dL <sup>2</sup> | 1.003 (1.0013, 1.005) | 0.0006  | 1.003 (1.01, 1.05)   | 0.0015  |
| HDL, per 10 mg/dL                                       | 1.04 (0.90, 1.19)     | 0.62    | 1.08 (0.89, 1.32)    | 0.43    |
| LDL, per 10 mg/dL                                       | 0.84 (0.75, 0.94)     | 0.004   | 0.95 (0.86, 1.05)    | 0.33    |
| Log TG, mg/dL                                           | 0.65 (0.45, 0.95)     | 0.025   | 0.82 (0.51, 1.33)    | 0.43    |

\*Each multivariable model includes the lipoprotein of interest and is adjusted for age, sex, race, percent fat, DM, heart failure, dialysis catheter, serum albumin and log CRP; a squared term was included for models including Apo A1 or Apo C3 because associations were nonlinear.  
Apolipoprotein A1 (Apo A 1), apolipoprotein B (Apo B), apolipoprotein C2 (Apo C2), Apolipoprotein C2 (Apo C3), high density lipoprotein (HDL), low density lipoprotein (LDL), triglyceride (TG).
